# Supplementary material
Source: PubMed Central journal article supplement (PMC3218630)
Supplement: supp_kwr192_kwr192_-_Web_tables_and_Appendix.pdf [file supp_kwr192_kwr192_-_Web_tables_and_Appendix.pdf]

**Web Table 1. Hazard ratios (HRs) and 95% confidence intervals (CIs) for invasive breast cancer incidence associated with smoking status among 76,622 post-menopausal women by obesity status defined by BMI $\geq$ 30 \* (Extension study not included)**

|                                                  | <i>Non-obesity</i> |                                            | <i>Obesity</i> |                                            |
|--------------------------------------------------|--------------------|--------------------------------------------|----------------|--------------------------------------------|
| <i>Exposure</i>                                  | <i>cases</i>       | <i>Multivariable-adjusted HR (95%CI)**</i> | <i>cases</i>   | <i>Multivariable-adjusted HR (95%CI)**</i> |
| <b>Smoking status</b>                            |                    |                                            |                |                                            |
| Never Smokers                                    | 907                | Referent                                   | 353            | Referent                                   |
| Ever smokers                                     | 997                | 1.18 (1.07 1.30)                           | 319            | 0.95 (0.81 1.12)                           |
| Former smokers                                   | 877                | 1.18 (1.07 1.30)                           | 288            | 0.96 (0.81 1.13)                           |
| Current Smokers                                  | 120                | 1.18 (0.97 1.44)                           | 31             | 0.92 (0.63 1.34)                           |
| <b>Age of smoking initiation</b>                 |                    |                                            |                |                                            |
| Less than 20                                     | 570                | 1.21 (1.09 1.35)                           | 188            | 0.99 (0.82 1.19)                           |
| 20-24                                            | 325                | 1.17 (1.02 1.33)                           | 89             | 0.89 (0.70 1.13)                           |
| 25 or older                                      | 102                | 1.08 (0.88 1.33)                           | 42             | 0.93 (0.67 1.29)                           |
| P value for trend                                |                    | 0.0003                                     |                | 0.66                                       |
| <b>Average No. of cigarettes per day</b>         |                    |                                            |                |                                            |
| <15                                              | 543                | 1.15 (1.03 1.28)                           | 163            | 0.96 (0.79 1.16)                           |
| 15 or more                                       | 454                | 1.22 (1.09 1.38)                           | 156            | 0.95 (0.78 1.15)                           |
| P value for trend                                |                    | 0.0004                                     |                | 0.56                                       |
| <b>Total No. of smoking years</b>                |                    |                                            |                |                                            |
| Less than 10                                     | 225                | 1.07 (0.92 1.24)                           | 75             | 0.97 (0.75 1.25)                           |
| 10-29                                            | 453                | 1.19 (1.06 1.34)                           | 131            | 0.89 (0.72 1.09)                           |
| 30-49                                            | 277                | 1.22 (1.06 1.41)                           | 107            | 1.05 (0.84 1.32)                           |
| 50 or more                                       | 42                 | 1.67 (1.22 2.29)                           | 6              | 0.73 (0.33 1.65)                           |
| P value for trend                                |                    | <0.0001                                    |                | 0.71                                       |
| <b>No. of smoking pack-years</b>                 |                    |                                            |                |                                            |
| Less than 10                                     | 402                | 1.09 (0.96 1.23)                           | 131            | 1.00 (0.81 1.23)                           |
| 10-<30                                           | 349                | 1.30 (1.15 1.48)                           | 88             | 0.87 (0.68 1.10)                           |
| 30-<50                                           | 134                | 1.16 (0.99 1.40)                           | 41             | 0.77 (0.61 1.07)                           |
| 50 or more                                       | 113                | 1.24 (1.01 1.51)                           | 59             | 1.19 (0.90 1.58)                           |
| P value for trend                                |                    | 0.0004                                     |                | 0.81                                       |
| <b>Years since quit smoking (former smokers)</b> |                    |                                            |                |                                            |
| less than 10                                     | 155                | 1.28 (1.08 1.53)                           | 61             | 0.89 (0.53 1.49)                           |
| 10-<20                                           | 219                | 1.20 (1.03 1.40)                           | 80             | 0.95 (0.72 1.26)                           |
| 20-<30                                           | 213                | 1.13 (0.97 1.32)                           | 61             | 0.90 (0.68 1.18)                           |
| 30 or more                                       | 235                | 1.17 (1.01 1.35)                           | 71             | 1.01 (0.78 1.31)                           |
| P value for trend                                |                    | 0.0008                                     |                | 0.59                                       |

\*The adjusted variables in all multi-adjusted models included age (<55, 55-59, 60-64, 65-69, 70-74, 75- ), race (American Indian or Alaskan Native, Asian or Pacific Islander, Black or African-American, Hispanic/Latino, non-Hispanic white, and other), education (high school or less, some college/technical training, college or some post-college, and master or higher), family history of cancer (yes/no), age of menarche (less than 12 years old, 12-13 years old, 14-15 years old, 16 years old or older), age of first live birth (never had term pregnancy, less than 20 years old, 20-29 years old, 30 years old or more), hormone use (no, estrogen alone, estrogen and progestin, mixed), parity (never pregnant, never had term pregnancy, 1, 2, 3, 4, 5+), alcohol intake (non drinker, past drinker, < 1 drink/month, 1 drink/month-<1 drink/wk, 1-<7 drinks/wk, 7+ drinks/wk), BMI (< 18.5, 18.5 - 24.9, 25.0 - 29.9, 30.0 - 34.9, 35.0 - 39.9,  $\geq$  40), physical activity (metabolic equivalent tasks (METs) per week: <5, 5-<10, 10-<20, 20-<30, 30 or more), mammography during last two years (yes/no). P for trend test included reference group.

**Web Table 2. Hazard ratios (HRs) and 95% confidence intervals (CIs) for invasive breast cancer incidence associated with smoking status among 76,622 post-menopausal women by abdominal obesity defined by waist circumference  $\geq 88$  cm\* (Extension study not included)**

|                                                  | <i>Non-obesity</i> |                                            | <i>Obesity</i> |                                            |
|--------------------------------------------------|--------------------|--------------------------------------------|----------------|--------------------------------------------|
| <i>Exposure</i>                                  | <i>cases</i>       | <i>Multivariable-adjusted HR (95%CI)**</i> | <i>cases</i>   | <i>Multivariable-adjusted HR (95%CI)**</i> |
| <b>Smoking status</b>                            |                    |                                            |                |                                            |
| Never Smokers                                    | 801                | Referent                                   | 459            | Referent                                   |
| Ever smokers                                     | 846                | 1.18 (1.07 1.31)                           | 470            | 1.01 (0.88 1.16)                           |
| Former smokers                                   | 750                | 1.19 (1.07 1.32)                           | 415            | 1.01 (0.87 1.16)                           |
| Current Smokers                                  | 96                 | 1.14 (0.92 1.42)                           | 55             | 1.01 (0.76 1.34)                           |
| <b>Age of smoking initiation</b>                 |                    |                                            |                |                                            |
| Less than 20                                     | 498                | 1.26 (1.12 1.41)                           | 260            | 0.98 (0.83 1.15)                           |
| 20-24                                            | 270                | 1.13 (0.98 1.30)                           | 144            | 1.02 (0.84 1.24)                           |
| 25 or older                                      | 78                 | 0.98 (0.78 1.24)                           | 66             | 1.11 (0.85 1.44)                           |
| P value for trend                                |                    | 0.0003                                     |                | 0.97                                       |
| <b>Average No. of cigarettes per day</b>         |                    |                                            |                |                                            |
| <15                                              | 471                | 1.14 (1.02 1.29)                           | 235            | 1.01 (0.86 1.19)                           |
| 15 or more                                       | 375                | 1.23 (1.09 1.40)                           | 235            | 1.01 (0.86 1.19)                           |
| P value for trend                                |                    | 0.0009                                     |                | 0.88                                       |
| <b>Total No. of smoking years</b>                |                    |                                            |                |                                            |
| Less than 10                                     | 199                | 1.05 (0.90 1.23)                           | 101            | 1.04 (0.83 1.29)                           |
| 10-29                                            | 389                | 1.20 (1.05 1.36)                           | 195            | 0.96 (0.80 1.14)                           |
| 30-49                                            | 223                | 1.23 (1.05 1.43)                           | 161            | 1.08 (0.90 1.30)                           |
| 50 or more                                       | 35                 | 1.84 (1.30 2.60)                           | 13             | 0.85 (0.49 1.48)                           |
| P value for trend                                |                    | <0.0001                                    |                | 0.77                                       |
| <b>No. of smoking pack-years</b>                 |                    |                                            |                |                                            |
| Less than 10                                     | 357                | 1.09 (0.96 1.24)                           | 175            | 1.02 (0.85 1.22)                           |
| 10-<30                                           | 292                | 1.29 (1.13 1.49)                           | 145            | 1.00 (0.82 1.21)                           |
| 30-<50                                           | 110                | 1.17 (0.96 1.44)                           | 65             | 0.87 (0.67 1.23)                           |
| 50 or more                                       | 87                 | 1.26 (1.01 1.58)                           | 85             | 1.16 (0.92 1.47)                           |
| P value for trend                                |                    | 0.0007                                     |                | 0.66                                       |
| <b>Years since quit smoking (former smokers)</b> |                    |                                            |                |                                            |
| less than 10                                     | 125                | 1.29 (1.07 1.57)                           | 91             | 1.02 (0.81 1.29)                           |
| 10-<20                                           | 185                | 1.23 (1.04 1.44)                           | 114            | 1.00 (0.81 1.24)                           |
| 20-<30                                           | 184                | 1.12 (0.95 1.32)                           | 90             | 0.98 (0.78 1.24)                           |
| 30 or more                                       | 203                | 1.15 (0.98 1.34)                           | 103            | 1.10 (0.89 1.37)                           |
| P value for trend                                |                    | 0.001                                      |                | 0.97                                       |

\*The adjusted variables in all multi-adjusted models included age (<55, 55-59, 60-64, 65-69, 70-74, 75- ), race (American Indian or Alaskan Native, Asian or Pacific Islander, Black or African-American, Hispanic/Latino, non-Hispanic white, and other), education (high school or less, some college/technical training, college or some post-college, and master or higher), family history of cancer (yes/no), age of menarche (less than 12 years old, 12-13 years old, 14-15 years old, 16 years old or older), age of first live birth (never had term pregnancy, less than 20 years old, 20-29 years old, 30 years old or more), hormone use (no, estrogen alone, estrogen and progestin, mixed), parity (never pregnant, never had term pregnancy, 1, 2, 3, 4, 5+), alcohol intake (non drinker, past drinker, < 1 drink/month, 1 drink/month-<1 drink/wk, 1-<7 drinks/wk, 7+ drinks/wk), BMI (< 18.5, 18.5 - 24.9, 25.0 - 29.9, 30.0 - 34.9, 35.0 - 39.9,  $\geq 40$ ), physical activity (metabolic equivalent tasks (METs) per week: <5, 5-<10, 10-<20, 20-<30, 30 or more), mammography during last two years (yes/no). P for trend test included reference group.

**Web Table 3. Hazard ratios (HRs) and 95% confidence intervals (CIs) for mortality from any cause other than invasive breast cancer with smoking status among 76,628 post-menopausal women by obesity status defined by BMI $\geq$ 30 \***

|                                                  | <i>Non-obesity</i> |                                           | <i>Obesity</i> |                                           | <i>P for interaction</i> |
|--------------------------------------------------|--------------------|-------------------------------------------|----------------|-------------------------------------------|--------------------------|
| <i>Exposure</i>                                  | <i>cases</i>       | <i>Multivariable-adjusted HR (95%CI)*</i> | <i>cases</i>   | <i>Multivariable-adjusted HR (95%CI)*</i> |                          |
| <b>Smoking status</b>                            |                    |                                           |                |                                           |                          |
| Never Smokers                                    | 2022               | Referent                                  | 868            | Referent                                  |                          |
| Ever smokers                                     | 2714               | 1.76 (1.66 1.87)                          | 1042           | 1.52 (1.38 1.68)                          | 0.01 <sup>1</sup>        |
| Former smokers                                   | 2095               | 1.55 (1.46 1.66)                          | 888            | 1.43 (1.29 1.58)                          | 0.02 <sup>2</sup>        |
| Current Smokers                                  | 619                | 3.27 (2.98 3.60)                          | 152            | 2.51 (2.10 3.00)                          |                          |
| <b>Age of smoking initiation</b>                 |                    |                                           |                |                                           | 0.06                     |
| Less than 20                                     | 1463               | 1.89 (1.76 2.03)                          | 589            | 1.66 (1.49 1.86)                          |                          |
| 20-24                                            | 896                | 1.66 (1.53 1.80)                          | 301            | 1.41 (1.23 1.61)                          |                          |
| 25 or older                                      | 355                | 1.57 (1.40 1.77)                          | 150            | 1.32 (1.11 1.58)                          |                          |
| P value for trend                                |                    | <0.0001                                   |                | <0.0001                                   |                          |
| <b>Average No. of cigarettes per day</b>         |                    |                                           |                |                                           | 0.006                    |
| <15                                              | 1262               | 1.41 (1.31 1.52)                          | 459            | 1.25 (1.11 1.41)                          |                          |
| 15 or more                                       | 1452               | 2.28 (2.12 2.45)                          | 581            | 1.85 (1.66 2.07)                          |                          |
| P value for trend                                |                    | <0.0001                                   |                | <0.0001                                   |                          |
| <b>Total No. of smoking years</b>                |                    |                                           |                |                                           | 0.002                    |
| Less than 10                                     | 395                | 1.16 (1.04 1.30)                          | 166            | 1.08 (0.91 1.28)                          |                          |
| 10-29                                            | 884                | 1.35 (1.24 1.47)                          | 368            | 1.29 (1.13 1.46)                          |                          |
| 30-49                                            | 1153               | 2.52 (2.33 2.72)                          | 445            | 2.03 (1.80 2.29)                          |                          |
| 50 or more                                       | 282                | 3.42 (3.01 3.89)                          | 61             | 2.49 (1.91 3.25)                          |                          |
| P value for trend                                |                    | <0.0001                                   |                | <0.0001                                   |                          |
| <b>No. of smoking pack-years</b>                 |                    |                                           |                |                                           | 0.001                    |
| Less than 10                                     | 772                | 1.21 (1.11 1.32)                          | 291            | 1.09 (0.95 1.25)                          |                          |
| 10-<30                                           | 843                | 1.69 (1.55 1.83)                          | 307            | 1.48 (1.30 1.70)                          |                          |
| 30-<50                                           | 489                | 2.37 (2.14 2.62)                          | 210            | 1.91 (1.63 2.23)                          |                          |
| 50 or more                                       | 610                | 3.36 (3.06 3.70)                          | 232            | 2.42 (2.08 2.81)                          |                          |
| P value for trend                                |                    | <0.0001                                   |                | <0.0001                                   |                          |
| <b>Years since quit smoking (former smokers)</b> |                    |                                           |                |                                           | 0.08                     |
| less than 10                                     | 401                | 2.54 (2.27 2.84)                          | 209            | 1.95 (1.66 2.28)                          |                          |
| 10-<20                                           | 606                | 1.82 (1.66 2.00)                          | 263            | 1.55 (1.35 1.79)                          |                          |
| 20-<30                                           | 457                | 1.46 (1.31 1.62)                          | 173            | 1.25 (1.06 1.48)                          |                          |
| 30 or more                                       | 522                | 1.17 (1.06 1.29)                          | 200            | 1.18 (1.01 1.38)                          |                          |
| P value for trend                                |                    | <0.0001                                   |                | <0.0001                                   |                          |

\*The adjusted variables in all multi-adjusted models included age (<55, 55-59, 60-64, 65-69, 70-74, 75- ), race (American Indian or Alaskan Native, Asian or Pacific Islander, Black or African-American, Hispanic/Latino, non-Hispanic white, and other), education (high school or less, some college/technical training, college or some post-college, and master or higher), family history of cancer (yes/no), age of menarche (less than 12 years old, 12-13 years old, 14-15 years old, 16 years old or older), age of first live birth (never had term pregnancy, less than 20 years old, 20-29 years old, 30 years old or more), hormone use (no, estrogen alone, estrogen and progestin, mixed), parity (never pregnant, never had term pregnancy, 1, 2, 3, 4, 5+), alcohol intake (non drinker, past drinker, < 1 drink/month, 1 drink/month-<1 drink/wk, 1-<7 drinks/wk, 7+ drinks/wk), BMI (< 18.5, 18.5 - 24.9, 25.0 - 29.9, 30.0 - 34.9, 35.0 - 39.9,  $\geq$  40), physical activity (metabolic equivalent tasks (METs) per week: <5, 5-<10, 10-<20, 20-<30, 30 or more), mammography during last two years (yes/no). P for trend test included reference group.

1: when smoking was categorized as never and ever smokers.

2: when smoking was categorized as never, former and current smokers.

**Web Table 4. Hazard ratios (HRs) and 95% confidence intervals (CIs) for mortality from any cause other than invasive breast cancer associated with smoking status among 76,628 post-menopausal women by abdominal obesity defined by waist circumference  $\geq 88$  cm\***

|                                                  | <i>Non-obesity</i> |                                           | <i>Obesity</i> |                                           | <i>P for interaction</i> |
|--------------------------------------------------|--------------------|-------------------------------------------|----------------|-------------------------------------------|--------------------------|
| <i>Exposure</i>                                  | <i>cases</i>       | <i>Multivariable-adjusted HR (95%CI)*</i> | <i>cases</i>   | <i>Multivariable-adjusted HR (95%CI)*</i> |                          |
| <b>Smoking status</b>                            |                    |                                           |                |                                           |                          |
| Never Smokers                                    | 1633               | Referent                                  | 1257           | Referent                                  |                          |
| Ever smokers                                     | 2061               | 1.73 (1.61 1.85)                          | 1693           | 1.61 (1.49 1.74)                          | 0.07 <sup>1</sup>        |
| Former smokers                                   | 1601               | 1.52 (1.42 1.64)                          | 1382           | 1.43 (1.36 1.60)                          | 0.21 <sup>2</sup>        |
| Current Smokers                                  | 460                | 3.30 (2.96 3.68)                          | 311            | 2.78 (2.44 3.16)                          |                          |
| <b>Age of smoking initiation</b>                 |                    |                                           |                |                                           | 0.25                     |
| Less than 20                                     | 1099               | 1.86 (1.72 2.02)                          | 953            | 1.74 (1.56 1.90)                          |                          |
| 20-24                                            | 698                | 1.65 (1.51 1.81)                          | 499            | 1.49 (1.34 1.66)                          |                          |
| 25 or older                                      | 264                | 1.50 (1.32 1.71)                          | 241            | 1.46 (1.27 1.68)                          |                          |
| P value for trend                                |                    | <0.0001                                   |                | <0.0001                                   |                          |
| <b>Average No. of cigarettes per day</b>         |                    |                                           |                |                                           | 0.001                    |
| <15                                              | 979                | 1.37 (1.27 1.49)                          | 742            | 1.35 (1.23 1.49)                          |                          |
| 15 or more                                       | 1082               | 2.29 (2.11 2.49)                          | 951            | 1.90 (1.74 2.08)                          |                          |
| P value for trend                                |                    | <0.0001                                   |                | <0.0001                                   |                          |
| <b>Total No. of smoking years</b>                |                    |                                           |                |                                           | 0.001                    |
| Less than 10                                     | 325                | 1.16 (1.03 1.31)                          | 236            | 1.11 (0.97 1.28)                          |                          |
| 10-29                                            | 681                | 1.32 (1.20 1.45)                          | 571            | 1.32 (1.19 1.46)                          |                          |
| 30-49                                            | 845                | 2.50 (2.29 2.73)                          | 753            | 2.15 (1.95 2.36)                          |                          |
| 50 or more                                       | 210                | 3.71 (3.20 4.30)                          | 133            | 2.58 (2.14 3.10)                          |                          |
| P value for trend                                |                    | <0.0001                                   |                | <0.0001                                   |                          |
| <b>No. of smoking pack-years</b>                 |                    |                                           |                |                                           | <0.0001                  |
| Less than 10                                     | 604                | 1.17 (1.06 1.28)                          | 459            | 1.19 (1.07 1.33)                          |                          |
| 10-<30                                           | 661                | 1.72 (1.57 1.89)                          | 489            | 1.48 (1.32 1.65)                          |                          |
| 30-<50                                           | 361                | 2.36 (2.10 2.66)                          | 338            | 2.00 (1.76 2.26)                          |                          |
| 50 or more                                       | 435                | 3.48 (3.12 3.89)                          | 407            | 2.53 (2.25 2.85)                          |                          |
| P value for trend                                |                    | <0.0001                                   |                | <0.0001                                   |                          |
| <b>Years since quit smoking (former smokers)</b> |                    |                                           |                |                                           | 0.12                     |
| less than 10                                     | 281                | 2.44 (2.14 2.79)                          | 329            | 2.10 (1.85 2.39)                          |                          |
| 10-<20                                           | 455                | 1.83 (1.64 2.04)                          | 414            | 1.59 (1.42 1.79)                          |                          |
| 20-<30                                           | 362                | 1.43 (1.27 1.61)                          | 268            | 1.33 (1.16 1.53)                          |                          |
| 30 or more                                       | 413                | 1.14 (1.02 1.27)                          | 309            | 1.22 (1.07 1.39)                          |                          |
| P value for trend                                |                    | <0.0001                                   |                | <0.0001                                   |                          |

\*The adjusted variables in all multi-adjusted models included age (<55, 55-59, 60-64, 65-69, 70-74, 75- ), race (American Indian or Alaskan Native, Asian or Pacific Islander, Black or African-American, Hispanic/Latino, non-Hispanic white, and other), education (high school or less, some college/technical training, college or some post-college, and master or higher), family history of cancer (yes/no), age of menarche (less than 12 years old, 12-13 years old, 14-15 years old, 16 years old or older), age of first live birth (never had term pregnancy, less than 20 years old, 20-29 years old, 30 years old or more), hormone use (no, estrogen alone, estrogen and progestin, mixed), parity (never pregnant, never had term pregnancy, 1, 2, 3, 4, 5+), alcohol intake (non drinker, past drinker, < 1 drink/month, 1 drink/month-<1 drink/wk, 1-<7 drinks/wk, 7+ drinks/wk), BMI (< 18.5, 18.5 - 24.9, 25.0 - 29.9, 30.0 - 34.9, 35.0 - 39.9,  $\geq 40$ ), physical activity (metabolic equivalent tasks (METs) per week: <5, 5-<10, 10-<20, 20-<30, 30 or more), mammography during last two years (yes/no). P for trend test included reference group.

1: when smoking was categorized as never and ever smokers.

2: when smoking was categorized as never, former and current smokers.

## **Web Appendix**

### **SHORT LIST OF WHI INVESTIGATORS**

**Program Office:** (National Heart, Lung, and Blood Institute, Bethesda, Maryland) Jacques Rossouw, Shari Ludlam, Joan McGowan, Leslie Ford, and Nancy Geller.

**Clinical Coordinating Center:** (Fred Hutchinson Cancer Research Center, Seattle, WA)

Ross Prentice, Garnet Anderson, Andrea LaCroix, Charles Kooperberg; (Medical Research Labs, Highland Heights, KY) Evan Stein; (University of California at San Francisco, San Francisco, CA) Steven Cummings.

**Clinical Centers:** (Albert Einstein College of Medicine, Bronx, NY) Sylvia Wassertheil-Smoller; (Baylor College of Medicine, Houston, TX) Haleh Sangi-Haghpeykar; (Brigham and Women's Hospital, Harvard Medical School, Boston, MA) JoAnn E. Manson; (Brown University, Providence, RI) Charles B. Eaton; (Emory University, Atlanta, GA) Lawrence S. Phillips; (Fred Hutchinson Cancer Research Center, Seattle, WA) Shirley Beresford; (George Washington University Medical Center, Washington, DC) Lisa Martin; (Los Angeles Biomedical Research Institute at Harbor- UCLA Medical Center, Torrance, CA) Rowan Chlebowski; (Kaiser Permanente Center for Health Research, Portland, OR) Erin LeBlanc; (Kaiser Permanente Division of Research, Oakland, CA) Bette Caan; (Medical College of Wisconsin, Milwaukee, WI) Jane Morley Kotchen; (MedStar Research Institute/Howard University, Washington, DC) Barbara V. Howard; (Northwestern University, Chicago/Evanston, IL) Linda Van Horn; (Rush Medical Center, Chicago, IL) Henry Black; (Stanford Prevention Research Center, Stanford, CA) Marcia L. Stefanick; (State University of New York at Stony Brook, Stony Brook, NY) Dorothy Lane; (The Ohio State University, Columbus, OH) Rebecca Jackson; (University of Alabama at Birmingham, Birmingham, AL) Cora E. Lewis; (University of Arizona, Tucson/Phoenix, AZ) Cynthia A. Thomson; (University at Buffalo, Buffalo, NY) Jean Wactawski-Wende; (University of California at Davis, Sacramento, CA) John Robbins; (University of California at Irvine, CA) F. Allan Hubbell; (University of California at Los Angeles, Los Angeles, CA) Lauren Nathan; (University of California at San Diego, LaJolla/Chula Vista, CA) Robert D. Langer; (University of Cincinnati, Cincinnati, OH) Margery Gass; (University of Florida, Gainesville/Jacksonville, FL) Marian Limacher; (University of Hawaii, Honolulu, HI) J. David Curb; (University of Iowa, Iowa City/Davenport, IA) Robert Wallace; (University of Massachusetts/Fallon Clinic, Worcester, MA) Judith Ockene; (University of Medicine and Dentistry of New Jersey, Newark, NJ) Norman Lasser; (University of Miami, Miami, FL) Mary Jo O'Sullivan; (University of Minnesota, Minneapolis, MN) Karen Margolis; (University of Nevada, Reno, NV) Robert Brunner; (University of North Carolina, Chapel Hill, NC) Gerardo Heiss; (University of Pittsburgh, Pittsburgh, PA) Lewis Kuller; (University of Tennessee Health Science Center, Memphis, TN) Karen C. Johnson; (University of Texas Health Science Center, San Antonio, TX) Robert Brzyski; (University of Wisconsin, Madison, WI) Gloria E. Sarto; (Wake Forest University School of Medicine, Winston-Salem, NC) Mara Vitolins; (Wayne State University School of Medicine/Hutzel Hospital, Detroit, MI) Michael S. Simon.

**Women's Health Initiative Memory Study:** (Wake Forest University School of Medicine, Winston-Salem, NC) Sally Shumaker.
